# Supplementary material for: Benzyl Isothiocyanate, a Major Component from the Roots of Salvadora Persica Is Highly Active against Gram-Negative Bacteria
Source: PubMed Central journal article supplement (PMC3148225; doi:10.1371/journal.pone.0023045), 2011-08-01
Supplement: pone.0023045.s002.pdf [file pone.0023045.s002.pdf]

**Table S1. Retardation factor (Rf) of MPLC fractions determined by TLC analysis**

| <b>MPLC fraction number *</b> | <b>Rf</b> | <b>Pooled MPLC sample</b> |
|-------------------------------|-----------|---------------------------|
| 1-7                           | 1.0       | 1                         |
| 8-18                          | 0.4       | 2                         |
| 19-20                         | 0.4-0.5   | 3                         |
| 21-23                         | 0.3-0.4   | 4                         |
| 24-30                         | 0.2       | 5                         |
| 31-53                         | 0.1       | 6                         |
| 54-56                         | >0.1      | 7                         |
| 57-70                         | >0.1      | 8                         |

\*MPLC fraction number refers to supplemental Figure S1.
